# Supplementary material for: Single-cell gene expression links SARS-CoV-2 infection and gut serotonin
Source: HighWire-hosted journal article supplement (doi:10.1136/gutjnl-2022-328262), 2022-08-23
Supplement: gutjnl-2022-328262supp001_data_supplement.pdf [file gutjnl-2022-328262supp001_data_supplement.pdf]

## Supplementary Methods

### Bioinformatic analysis of single-cell data

All commands for the reanalysis of the single cell sequencing dataset are available at <https://gist.github.com/beardymcjohnface/27f3190fc48cf4a140994f83c3047494>.

Briefly, single cell sequencing data, consisting of raw read counts of all genes and cells, were downloaded from the Gene Expression Omnibus for the accession GSE92332 [7]. Raw counts were converted to Counts Per Million (CPM). The log<sub>2</sub> of the mean CPM and the fraction of cells expressing a gene were calculated for the genes of interest across the different cell types and visualised in R. Next, subsets were generated consisting of cells expressing each EEC marker gene (CPM > 100). The log<sub>2</sub> of mean CPM and fraction of cells expressing the genes of interest were recalculated for each subset and was again visualised in R.
